# Supplementary material for: Metals Induce Genotoxicity in Three Cardoon Cultivars: Relation to Metal Uptake and Distribution in Extra- and Intracellular Fractions
Source: MDPI journal article supplement (doi:10.3390/plants11040475), 2022-02-09
Supplement: s1 [file s1]

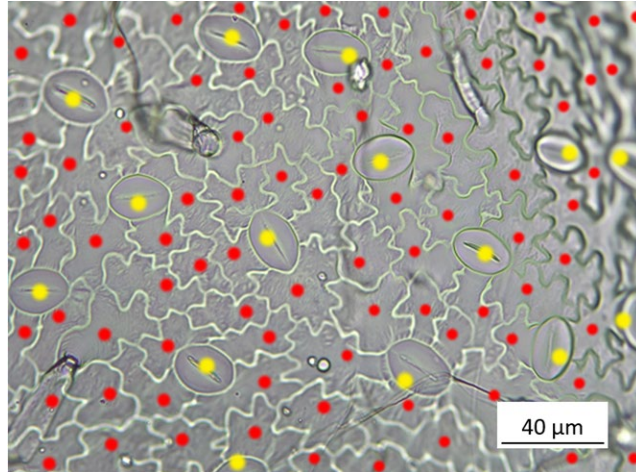

**Figure S1.** Epidermal cell count. Red spots indicated one epidermal cell; yellow spot indicate a stoma.
