# Supplementary material for: Metals Induce Genotoxicity in Three Cardoon Cultivars: Relation to Metal Uptake and Distribution in Extra- and Intracellular Fractions
Source: MDPI journal article supplement (doi:10.3390/plants11040475), 2022-02-09
Supplement: s1 [file s1]

**Table S1.** - Changes of total bands in samples untreated (Ct) and treated with Cd and Pb compared to the control reference plant (C). Polymorphism in ISSR profiles based on band changes common to the three replicas: a - appeared band; b - disappeared band; c - increased band intensity; d - decreased band intensity. C-bands is the number of bands observed in the control reference plant with each primer. SAR, SIC and SPA indicate the three cardoon cultivar analyzed: Sardo, Siciliano and Spagnolo. For more details see M&M.

| SAR     |           | Ct |    |   |   | Cd  |     |    |    | Pb  |     |    |    |
|---------|-----------|----|----|---|---|-----|-----|----|----|-----|-----|----|----|
| Primer  | C - bands | a  | b  | c | d | a   | b   | c  | d  | a   | b   | c  | d  |
| 10      | 8         | 2  | 2  | 2 | 0 | 5   | 1   | 4  | 0  | 5   | 0   | 6  | 0  |
| 14      | 7         | 5  | 1  | 0 | 0 | 8   | 2   | 0  | 0  | 17  | 1   | 4  | 0  |
| 15      | 12        | 1  | 0  | 0 | 0 | 11  | 14  | 3  | 0  | 7   | 11  | 0  | 5  |
| 18      | 12        | 1  | 2  | 2 | 0 | 7   | 15  | 3  | 0  | 11  | 11  | 2  | 0  |
| 19      | 14        | 4  | 2  | 0 | 2 | 4   | 5   | 0  | 5  | 6   | 7   | 0  | 4  |
| 20      | 11        | 0  | 0  | 0 | 1 | 8   | 4   | 0  | 3  | 9   | 2   | 0  | 5  |
| 22      | 9         | 1  | 2  | 0 | 0 | 2   | 4   | 3  | 0  | 4   | 2   | 8  | 0  |
| 23      | 10        | 3  | 3  | 0 | 0 | 8   | 6   | 1  | 2  | 9   | 5   | 2  | 0  |
| w843    | 5         | 1  | 0  | 0 | 0 | 6   | 4   | 2  | 3  | 2   | 3   | 3  | 2  |
| w814    | 5         | 0  | 1  | 1 | 1 | 1   | 3   | 2  | 3  | 3   | 3   | 6  | 1  |
| w898    | 11        | 1  | 3  | 0 | 1 | 19  | 8   | 3  | 2  | 23  | 7   | 8  | 2  |
| w899    | 8         | 0  | 0  | 0 | 0 | 0   | 9   | 0  | 0  | 7   | 6   | 0  | 2  |
| w901    | 12        | 4  | 2  | 0 | 0 | 11  | 14  | 0  | 2  | 7   | 15  | 0  | 1  |
| 8082    | 7         | 2  | 2  | 0 | 0 | 0   | 3   | 5  | 0  | 1   | 5   | 6  | 0  |
| 8564    | 12        | 0  | 1  | 0 | 0 | 5   | 5   | 2  | 0  | 3   | 10  | 2  | 0  |
| 8565    | 14        | 3  | 3  | 1 | 1 | 2   | 6   | 3  | 0  | 0   | 8   | 3  | 3  |
| DAT     | 9         | 0  | 1  | 0 | 0 | 2   | 8   | 1  | 0  | 4   | 8   | 5  | 0  |
| HAD     | 7         | 1  | 0  | 0 | 0 | 4   | 3   | 2  | 3  | 8   | 2   | 3  | 0  |
| MAN     | 10        | 1  | 1  | 0 | 0 | 1   | 3   | 0  | 0  | 3   | 6   | 1  | 0  |
| TE      | 11        | 1  | 1  | 3 | 0 | 1   | 1   | 1  | 0  | 4   | 2   | 1  | 2  |
| Tot     | 194       | 31 | 27 | 9 | 6 | 105 | 118 | 35 | 23 | 133 | 114 | 60 | 27 |
| a+b     |           | 58 |    |   |   | 223 |     |    |    | 247 |     |    |    |
| a+b+c+d |           | 73 |    |   |   | 281 |     |    |    | 334 |     |    |    |

| SIC | Ct | Cd | Pb |
|-----|----|----|----|
|-----|----|----|----|

| Primer  | C - bands | a  | b  | c  | d  | a   | b  | c  | d  | a   | b  | c  | d  |
|---------|-----------|----|----|----|----|-----|----|----|----|-----|----|----|----|
| 10      | 12        | 0  | 2  | 2  | 0  | 3   | 5  | 0  | 1  | 7   | 5  | 2  | 3  |
| 14      | 11        | 0  | 0  | 0  | 0  | 9   | 8  | 4  | 0  | 5   | 5  | 4  | 1  |
| 15      | 8         | 0  | 0  | 0  | 0  | 5   | 0  | 0  | 0  | 1   | 2  | 0  | 0  |
| 18      | 11        | 2  | 3  | 0  | 0  | 4   | 3  | 1  | 3  | 5   | 6  | 1  | 2  |
| 19      | 14        | 0  | 0  | 0  | 0  | 0   | 0  | 0  | 0  | 0   | 0  | 0  | 0  |
| 20      | 18        | 0  | 0  | 0  | 0  | 0   | 0  | 0  | 0  | 0   | 0  | 0  | 0  |
| 22      | 8         | 0  | 4  | 0  | 6  | 0   | 5  | 8  | 8  | 2   | 3  | 0  | 12 |
| 23      | 10        | 0  | 0  | 0  | 0  | 5   | 4  | 0  | 4  | 5   | 5  | 1  | 2  |
| w843    | 6         | 2  | 1  | 1  | 1  | 3   | 0  | 3  | 0  | 4   | 1  | 4  | 0  |
| w814    | 5         | 2  | 0  | 3  | 1  | 4   | 4  | 5  | 1  | 8   | 4  | 6  | 1  |
| w898    | 20        | 5  | 2  | 4  | 2  | 4   | 12 | 9  | 2  | 5   | 13 | 11 | 0  |
| w899    | 4         | 0  | 0  | 0  | 0  | 0   | 3  | 2  | 0  | 2   | 2  | 1  | 0  |
| w901    | 14        | 1  | 6  | 0  | 0  | 5   | 5  | 0  | 0  | 2   | 7  | 4  | 0  |
| 8082    | 6         | 3  | 4  | 0  | 0  | 5   | 5  | 2  | 0  | 2   | 4  | 1  | 0  |
| 8564    | 6         | 1  | 1  | 0  | 0  | 0   | 3  | 4  | 0  | 0   | 3  | 6  | 0  |
| 8565    | 9         | 1  | 1  | 2  | 0  | 3   | 4  | 3  | 0  | 4   | 4  | 2  | 0  |
| DAT     | 7         | 2  | 0  | 0  | 3  | 0   | 1  | 3  | 0  | 0   | 1  | 2  | 1  |
| HAD     | 13        | 5  | 8  | 2  | 0  | 6   | 16 | 5  | 0  | 3   | 13 | 11 | 1  |
| MAN     | 9         | 3  | 3  | 0  | 0  | 6   | 4  | 0  | 0  | 3   | 2  | 4  | 1  |
| TE      | 9         | 6  | 3  | 0  | 1  | 7   | 0  | 0  | 2  | 5   | 3  | 1  | 2  |
| Tot     | 200       | 33 | 38 | 14 | 14 | 69  | 82 | 49 | 21 | 63  | 83 | 61 | 26 |
| a+b     |           | 71 |    |    |    | 151 |    |    |    | 146 |    |    |    |
| a+b+c+d |           | 99 |    |    |    | 221 |    |    |    | 233 |    |    |    |

[illegible]

|                |     |    |    |    |   |     |    |    |   |     |    |    |    |
|----------------|-----|----|----|----|---|-----|----|----|---|-----|----|----|----|
| <b>20</b>      | 9   | 0  | 0  | 0  | 0 | 0   | 0  | 0  | 0 | 0   | 0  | 0  | 0  |
| <b>22</b>      | 10  | 4  | 4  | 2  | 0 | 11  | 9  | 12 | 0 | 10  | 4  | 15 | 0  |
| <b>23</b>      | 12  | 1  | 1  | 0  | 0 | 9   | 11 | 9  | 0 | 6   | 8  | 9  | 0  |
| <b>w843</b>    | 10  | 5  | 6  | 0  | 0 | 10  | 4  | 3  | 1 | 6   | 8  | 5  | 1  |
| <b>w814</b>    | 6   | 3  | 2  | 4  | 2 | 5   | 3  | 3  | 0 | 1   | 2  | 4  | 3  |
| <b>w898</b>    | 20  | 0  | 0  | 0  | 3 | 0   | 2  | 4  | 2 | 1   | 3  | 3  | 3  |
| <b>w899</b>    | 4   | 1  | 1  | 1  | 0 | 1   | 0  | 3  | 1 | 1   | 2  | 2  | 0  |
| <b>w901</b>    | 9   | 0  | 0  | 0  | 0 | 0   | 0  | 0  | 0 | 0   | 0  | 0  | 0  |
| <b>8082</b>    | 6   | 0  | 0  | 2  | 0 | 3   | 2  | 8  | 0 | 5   | 2  | 11 | 0  |
| <b>8564</b>    | 4   | 2  | 2  | 0  | 0 | 3   | 2  | 0  | 0 | 3   | 3  | 0  | 0  |
| <b>8565</b>    | 10  | 0  | 0  | 1  | 3 | 1   | 3  | 0  | 1 | 2   | 2  | 0  | 2  |
| <b>DAT</b>     | 6   | 0  | 0  | 0  | 0 | 3   | 0  | 3  | 0 | 1   | 0  | 0  | 0  |
| <b>HAD</b>     | 11  | 2  | 1  | 2  | 0 | 4   | 6  | 8  | 0 | 5   | 6  | 6  | 1  |
| <b>MAN</b>     | 13  | 5  | 4  | 2  | 0 | 6   | 5  | 1  | 0 | 2   | 3  | 2  | 0  |
| <b>TE</b>      | 15  | 0  | 0  | 0  | 0 | 0   | 0  | 0  | 0 | 0   | 0  | 0  | 0  |
| <b>Tot</b>     | 206 | 27 | 24 | 17 | 8 | 56  | 53 | 60 | 5 | 48  | 54 | 61 | 10 |
| <b>a+b</b>     |     | 51 |    |    |   | 109 |    |    |   | 102 |    |    |    |
| <b>a+b+c+d</b> |     | 76 |    |    |   | 174 |    |    |   | 173 |    |    |    |
